# Supplementary material for: Slippery Liquid-Like Solid Surfaces with Promising Antibiofilm Performance under Both Static and Flow Conditions
Source: PubMed Central journal article supplement (PMC9096797; doi:10.1021/acsami.1c14533), 2022-01-31
Supplement: am1c14533_si_001.pdf [file am1c14533_si_001.pdf]

## Supporting Information

# Slippery Liquid-Like Solid Surfaces with Promising Antibiofilm Performance in both Static and Flow Conditions

*Yufeng Zhu<sup>1</sup>, Glen McHale<sup>2</sup>, Jack Dawson<sup>1</sup>, Steven Armstrong<sup>2</sup>, Gary Wells<sup>3</sup>, Rui Han<sup>1</sup>,  
Hongzhong Liu<sup>4</sup>, Waldemar Vollmer<sup>5</sup>, Paul Stoodley<sup>5,6</sup>, Nicholas Jakobovics<sup>7</sup>, Jinju Chen<sup>1\*</sup>.*

<sup>1</sup> School of Engineering, Newcastle University, Newcastle Upon Tyne, NE1 7RU, UK. <sup>2</sup> School of Engineering, University of Edinburgh, Edinburgh, EH9 3FB, UK. <sup>3</sup> School of Mechanical Engineering, Xi'an Jiaotong University, Xi'an 710054, China; <sup>4</sup> Centre for Bacterial Cell Biology, Biosciences Institute, Newcastle University, Newcastle upon Tyne, NE2 4AX, UK. <sup>5</sup> Department of Microbial Infection and Immunity and the Department of Orthopaedics, The Ohio State University, Columbus, OH, 43210, USA. <sup>6</sup> National Centre for Advanced Tribology at Southampton (nCATS), National Biofilm Innovation Centre (NBIC), Mechanical Engineering, University of Southampton, Southampton, S017 1BJ, UK. <sup>7</sup> School of Dental Sciences, Faculty of Medical Sciences, Newcastle University, Newcastle Upon Tyne, NE2 4BW, UK.

\*Corresponding author. Email: Jinju.chen@ncl.ac.uk

### Measurement of oil thickness for S-PDMS

The weight ( $w_1$ ) of S-PDMS after a gentle wipe (the same protocol to prepare S-PDMS for surface wetting measurements and antibiofilm tests) was measured. The weight ( $w_2$ ) and the dimensions ( $x,y,z$ ) of the swollen PDMS (after vigorously wiping off all surface oil from S-PDMS) was then measured. A total of 10 replicates were used for the measurements.

Due to the nature of physical absorption, the oil thickness ( $t$ ) is assumed uniform in all directions. The oil thickness is then determined using following equation<sup>1</sup>

$$\frac{w_1 - w_2}{\text{oildensity}} = (x + 2t)(y + 2t)(z + 2t) - xyz \quad (\text{S1})$$

where  $x,y,z$  are the length, width and height of the swollen PDMS substrate, respectively. The oil density used in this study was  $0.93\text{g/cm}^3$ . A matlab code was written to determine oil thickness for various S-PDMS before flow, after 2-days and 7-days flow.

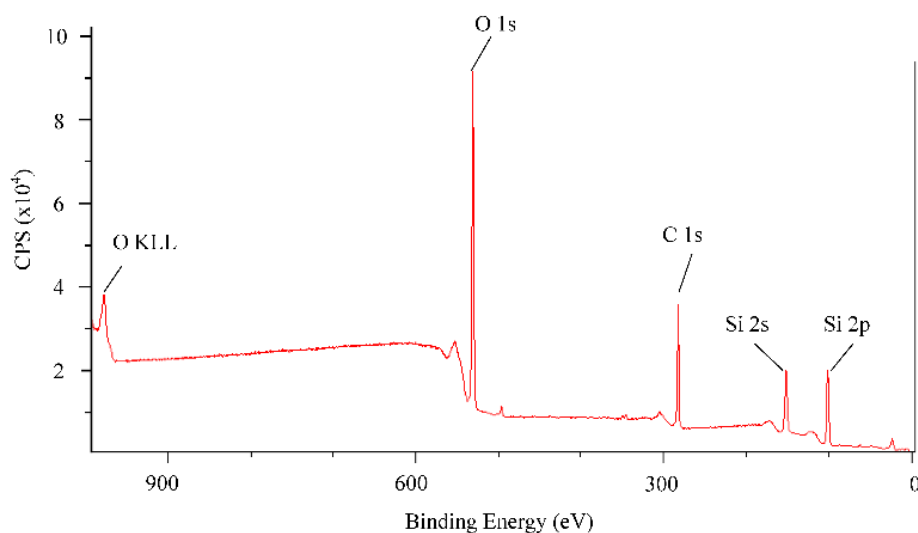

**Figure S1.**

**The XPS spectrum of SOCAL. It shows the similar spectra to PDMS<sup>2</sup>.**

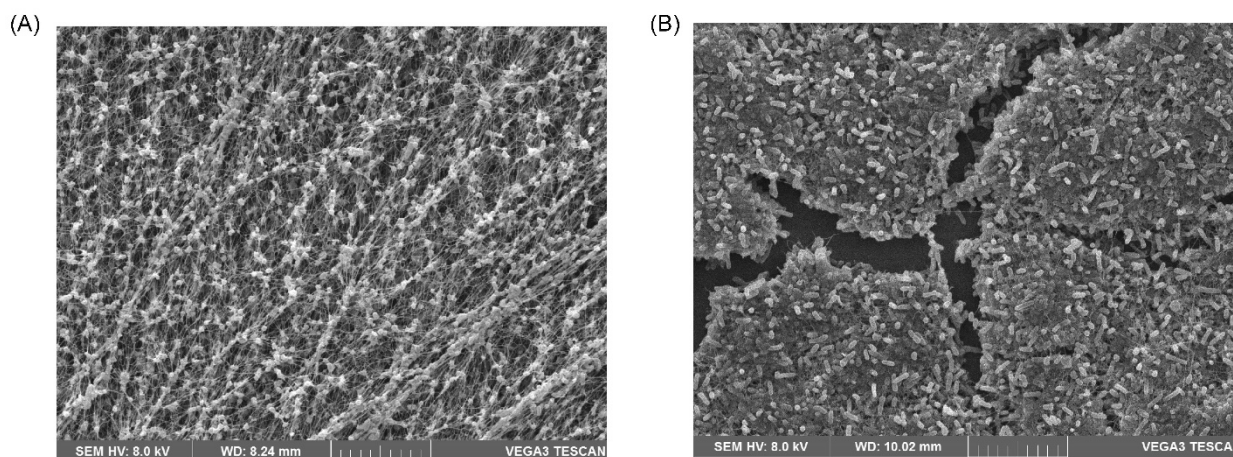

**Figure S2.**

**High resolution SEM images of *P. aeruginosa* PAO1 after 7-days (A) static and (B) dynamic cultures. The scale bar is 10 $\mu$ m. Loose and dense EPS were found, respectively.**

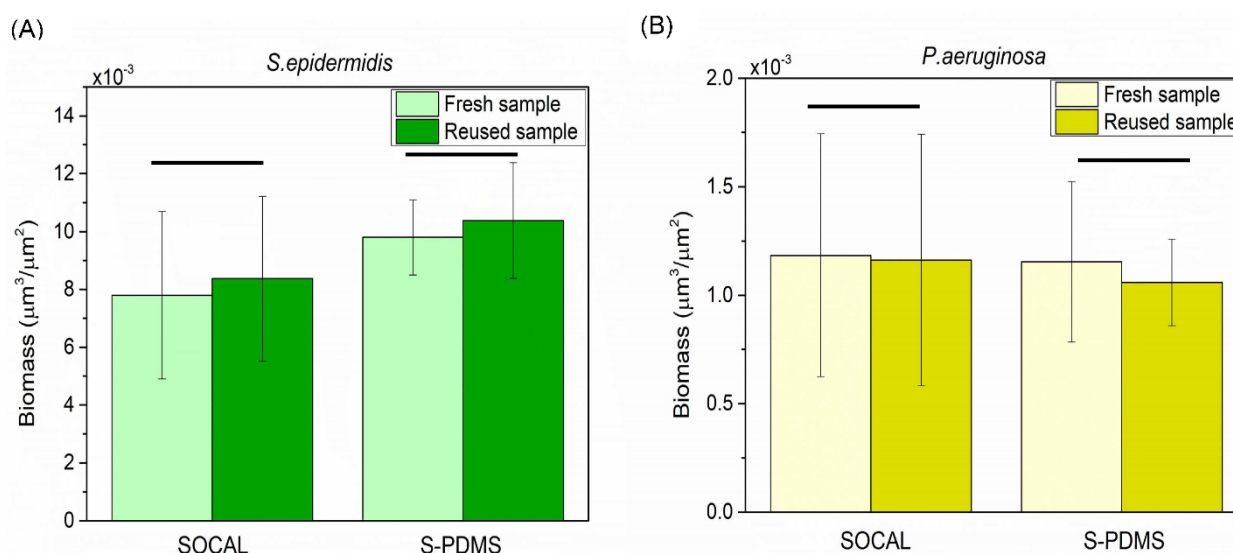

**Figure S3.**

**Comparison of 7-day biofilms grown in static culture: (A) *S. epidermidis* FH8 and (B) *P. aeruginosa* PAO1 on fresh SOCAL or S-PDMS and their re-used counterparts after wiping off pre-grown 2-days biofilms. There is no significant difference for biomass between fresh samples and their re-used counterparts for both SOCAL and S-PDMS. In all cases, 15 images were analyzed for each surface from 3 independent experiments.**

## AFM nanoindentation data analysis of SOCAL

SOCAL has exhibited viscoelastic properties which may be approximated by a Prony series model. Therefore, the following indentation model was adopted to analyse the force-displacement curves ( $F-h$ ) for nanoindentation tests<sup>3-5</sup>.

$$F = \frac{2}{\pi(1-\nu^2)} \tan(\alpha) h^2 [g_\infty + g_1 \frac{\tau}{t} (1 - \exp(-\frac{t}{\tau}))] \quad (\text{S2})$$

$$g_\infty + g_1 = 1 \quad (\text{S3})$$

$$E = E_0 g_\infty \quad (\text{S4})$$

where  $E$  is Young's modulus of the samples,  $\alpha$  is semi-included angle of an indenter ( $25^\circ$  in this study),  $\nu$  is Poisson's ratio which is approximately 0.5,  $t$  is the loading time and  $\tau$  is time constant.

MATLAB code was written to determine the Young's modulus. At least 30 curves were analyzed for each indentation depth. The apparent modulus-indentation depth curve was fitted to an exponential function, and the extrapolated module for SOCAL is about 8.8kPa (see Fig. S4).

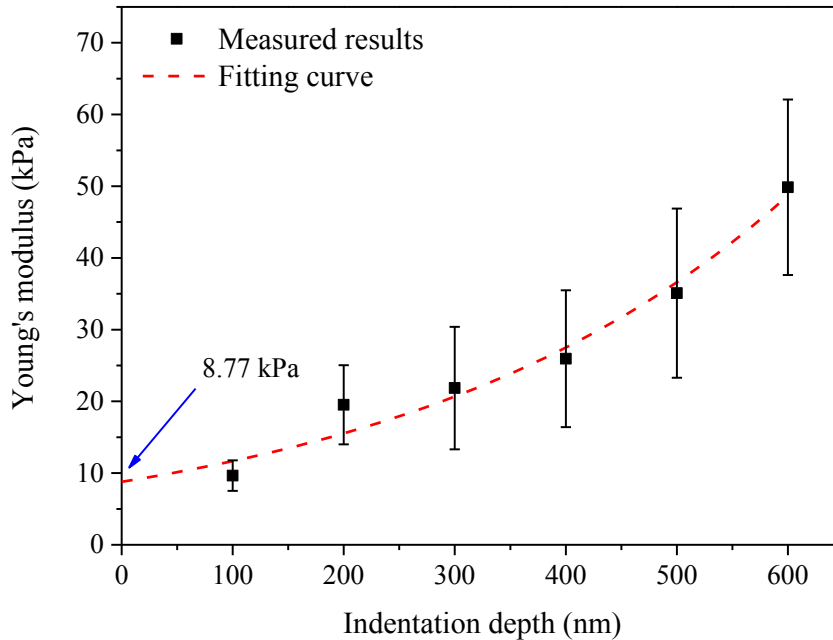

**Figure S4.** The measured apparent Young's modulus at different indentation depth. The extrapolated modulus was an estimated modulus of SOCAL.

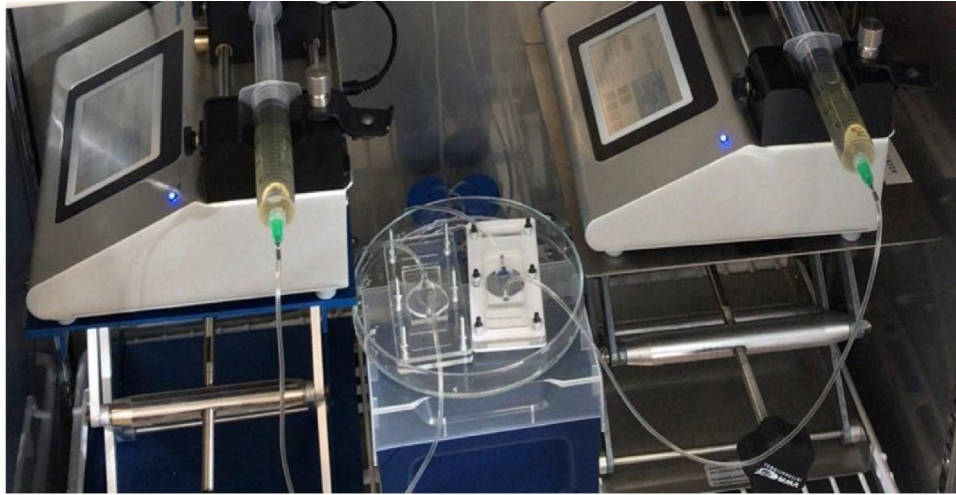

**Figure S5.**

The experimental set-up for the dynamic culture adopted in this study.

- (1) Cao, Y.; Jana, S.; Tan, X.; Bowen, L.; Zhu, Y.; Dawson, J.; Han, R.; Exton, J.; Liu, H.; McHale, G.; Jakubovics, N. S.; Chen, J. Antiwetting and Antifouling Performances of Different Lubricant-Infused Slippery Surfaces. *Langmuir* **2020**, *36* (45), 13396–13407.
- (2) Louette, P.; Bodino, F.; Pireaux, J. J. Poly(dimethyl siloxane) (PDMS) XPS Reference Core Level and Energy Loss Spectra. *Surf. Sci. Spectra* **2005**, *12*, 38-43.
- (3) Chen, J. J.; Lu, G. X. Finite Element Modelling of Nanoindentation based Methods for Mechanical Properties of Cells. *J. Biomech.* **2012**, *45* (16), 2810-2816.
- (4) Chen, J. J. Nanobiomechanics of Living Cells: a Review. *Interface Focus* **2014**, *4* (2), No. 20130055.
- (5) Chen, J.; Wright, K. E.; Birch, M. A. Nanoscale Viscoelastic Properties and Adhesion of Polydimethylsiloxane for Tissue Engineering. *Acta Mech Sin.* **2014**, *30* (1), 2-6.
